# Supplementary material
Source: PubMed Central journal article supplement (PMC4569215)
Supplement: brc-0010-0189-s01.pdf [file brc-0010-0189-s01.pdf]

## Appendix:

### Members of the 'AGO Breast Committee' in alphabetical order:

Prof. Dr. Ute-Susann Albert  
Krankenhaus Nordwest GmbH, Frankfurt a.M.

Dr. Ingo Bauerfeind  
Frauenklinik im Klinikum Landshut

Dr. Joachim Bischoff  
Klinikum Dessau

Prof. Dr. Jens Uwe Blohmer  
Charité, Berlin

Dr. Klaus Brunnert  
Klinik für Senologie und Plastische Chirurgie, Osnabrück

Prof. Dr. Peter Dall  
Städtisches Klinikum Lüneburg

Prof. Dr. Ingo J. Diel  
CGG Klinik Mannheim

Prof. Dr. Tanja Fehm  
Universitätsfrauenklinik Düsseldorf

PD Dr. Nikos Fersis  
Klinikum Bayreuth

Prof. Dr. Michael Friedrich  
Helios-Klinikum Krefeld

PD Dr. Kay Friedrichs  
Gynäkologische Gemeinschaftspraxis, Hamburg

Prof. Dr. Bernd Gerber  
Universitäts-Frauenklinik Rostock

Prof. Dr. Volker Hanf  
Klinikum Fürth

Prof. Dr. Nadia Harbeck  
Breast Center, Dept. OB&GYN, University of Munich

Prof. Dr. Jens Huober  
Universitätsklinikum Ulm

Prof. Dr. Christian Jackisch  
Klinikum Offenbach

Univ. Prof. Dr. Wolfgang Janni  
Universitätsklinikum Ulm

Prof. Dr. Hans H. Kreipe  
Medizinische Hochschule Hannover

PD Dr. Sherko Kümmel  
Evang. Huysens-Stiftung, Essen

Prof. Dr. med. Thorsten Kühn  
Klinikum Esslingen

PD Dr. med. Cornelia Liedtke  
Universitätsklinikum Schleswig-Holstein, Lübeck

Prof. Dr. Sibylle Loibl  
GBG Forschungs GmbH, Neu-Isenburg

Prof. Dr. Michael Lux  
Universitätsfrauenklinik Erlangen

Prof. Dr. Hans-Joachim Lück  
Gynäkologisch-Onkologische Praxis Hannover

Prof. Dr. Nicolai Maas  
Universitätsklinikum Schleswig-Holstein

Prof. Dr. Volker Möbus  
Städt. Kliniken Frankfurt-Höchst

Prof. Dr. Volkmar Müller  
Universitätsklinikum Hamburg-Eppendorf

Prof. Dr. Gunter von Minckwitz  
GBG Forschungs GmbH, Neu-Isenburg

Prof. Dr. Christoph Mundhenke  
Universitätsklinikum Schleswig-Holstein, Kiel

Prof. Dr. Ulrike Nitz  
Bethesda Krankenhaus Mönchengladbach

Dr. Mahdi Rezai  
Luisenkrankenhaus, Düsseldorf

Prof. Dr. Achim Rody  
Universitätsklinikum Schleswig-Holstein Campus Lübeck

Prof. Dr. Anton Scharl  
Klinikum St. Marien, Amberg

Prof. Dr. Rita Schmutzler  
Klinikum der Universität zu Köln

Prof. Dr. Marcus Schmidt  
Universitätsfrauenklinik Mainz

Prof. Dr. Andreas Schneeweiss  
Nationales Centrum für Tumorerkrankungen  
Gynäkologische Onkologie, Universitätsklinikum Heidelberg

Prof. Dr. Florian Schütz  
Klinikum der Ruprecht-Karl-Univ. Heidelberg

Prof. Dr. Ingrid Schreer  
Universitätsklinikum Kiel

Prof. Dr. H. Peter Sinn  
Klinikum der Ruprecht-Karl-Univ. Heidelberg

Prof. Dr. Erich Solomayer  
Universitätsklinikum des Saarlandes, Homburg

Prof. Dr. Rainer Souchon  
Berlin

Prof. Dr. Elmar Stickeler  
Universitätsfrauenklinik, Freiburg

PD Dr. med. Marc Thill  
Agaplesion Markus Krankenhaus, Frankfurt a. M.

Prof. Dr. Christoph Thomssen  
Universitätsklinik u. Poliklinik für Gynäkologie, Halle/Saale

Prof. Dr. Michael Untch  
Frauenklinik und interdisziplinäres Brustzentrum  
Helios-Kliniken Berlin

Prof. Dr. Frederik Wenz  
Sektion Strahlentherapie, Universitätsklinikum Mannheim

Stellvertretend für die Deutsche Gesellschaft für Radioonkologie (DEGRO):  
Prof. Dr. Wilfried Budach  
Universitätsklinikum Düsseldorf

Figures



AGO e.V.  
in der DGGG e.V.  
sowie  
in der DGK e.V.  
Guidelines Breast  
Version 2015.1

www.ago-online.de

Further Information

References

FORSCHEN  
LEHREN  
HEILEN

## Strategy after Diagnosis of Central Papilloma

Oxford / AGO  
LoE / GR

---

➤ **Papilloma without atypia in core needle or vacuum biopsies:**  
→ no further therapy, when biopsy sufficiently representative (100mm<sup>2</sup>) and no discordance to imaging

➤ **Papilloma with atypia in core needle or vacuum biopsies:**  
→ open biopsy

**Papilloma at resection margin:**  
→ no published data available

3a C ++

3a C ++

Fig. 1. Strategy after diagnosis of central papilloma.



AGO e.V.  
in der DGGG e.V.  
sowie  
in der DGK e.V.  
Guidelines Breast  
Version 2015.1

www.ago-online.de

Further Information

References

FORSCHEN  
LEHREN  
HEILEN

## Surgical Treatment of Axillary Lymph Nodes pre and post NACT (Neoadjuvant Chemotherapy)

Oxford / AGO  
LoE / GR

---

| SLNB pre or post NACT - cN0                       |                                           |                           |                    |    |   |     |
|---------------------------------------------------|-------------------------------------------|---------------------------|--------------------|----|---|-----|
| SLNB pre NACT                                     |                                           |                           |                    | 2b | B | +   |
| SLNB post NACT*                                   |                                           |                           |                    | 2a | B | +/- |
| Surgical Procedure according to lymph node status |                                           |                           |                    |    |   |     |
| cN-status (prior therapy)                         | pN-status (prior therapy)                 | cN-status (after therapy) | Surgical procedure |    |   |     |
| cN0                                               | pN0(sn)                                   | -                         | nihil              | 1a | A | +   |
| cN0                                               | pN+(sn) acc. ACOSOG Z11** criteria        | ycN0                      | ALND               | 3  | B | +/- |
| cN0                                               | pN+(sn) not acc. to ACOSOG Z11** criteria | ycN0                      | ALND               | 2b | B | +   |
| cN+                                               | cN+ (CNB/FNA)                             | ycN0                      | SNB<br>ALND        | 2a | B | +/- |
|                                                   |                                           | ycN+ (CNB/FNA)            | ALND               | 2b | B | +   |

\*radiocolloid and blue dye, study participation recommended

\*\*T1/T2, BCS, 1-2 SLN pos., breast radiation

Fig. 2. Surgical treatment of axillary lymph nodes pre and post NACT.

## Axillary Intervention in Patients with Positive Sentinel Lymph Nodes

|                                                                                                                                     | Oxford / AGO<br>LoE / GR |   |      |
|-------------------------------------------------------------------------------------------------------------------------------------|--------------------------|---|------|
| <b>Axillary dissection or RT of the axilla, if 1-2 pos. SLN:</b>                                                                    |                          |   |      |
| ➤ BCT and ACOSOG Z011-criteria fulfilled                                                                                            | 1b                       | B | +/-* |
| ➤ No axillary treatment                                                                                                             | 1b                       | B | +/-  |
| ➤ BCT and ACOSOG Z011-criteria <u>not</u> met                                                                                       | 1b                       | B | ++*  |
| ➤ Mastectomy, RT of chest wall indicated and ACOSOG Z011-criteria fulfilled                                                         | 5                        | D | +/-* |
| ➤ No axillary treatment                                                                                                             | 5                        | D | +/-  |
| ➤ Mastectomy, RT of chest wall indicated and ACOSOG Z011-criteria <u>not</u> met or Mastectomy, RT of chest wall <u>not</u> planned | 1b                       | D | ++   |
| <b>Axillary dissection or RT of the axilla, if ≥3 pos. SLN</b>                                                                      |                          |   |      |
| ➤ Axillary dissection                                                                                                               | 1b                       | B | ++   |
| ➤ Radiotherapy of the axilla                                                                                                        | 1b                       | B | +    |

\*Study participation recommended

**Fig. 3.** Axillary interventions in patients with positive sentinel lymph nodes.

## Adjuvant Chemotherapy without Concurrent Trastuzumab: Overview

|                                             | Oxford / AGO<br>LoE / GR |   |     |
|---------------------------------------------|--------------------------|---|-----|
| ➤ Anthracycline / taxane based chemotherapy | 1a                       | A | ++  |
| ➤ If anthracyclines cannot be given         |                          |   |     |
| ➤ Docetaxel plus cyclophosphamide           | 1b                       | B | +   |
| ➤ Paclitaxel mono weekly                    | 1b                       | B | +/- |
| ➤ CMF                                       | 1a                       | A | +/- |
| ➤ Dose-dense in case of high tumor burden   | 1a                       | A | ++  |

**Fig. 4.** Adjuvant chemotherapy without concurrent trastuzumab.

|                                                                                                                                                                                                                                                                                                               |                                                     | Oxford / AGO<br>LoE / GR |   |   |
|---------------------------------------------------------------------------------------------------------------------------------------------------------------------------------------------------------------------------------------------------------------------------------------------------------------|-----------------------------------------------------|--------------------------|---|---|
|  <p>AGO e. V.<br/>In der DGGG e.V.<br/>e.o.V.<br/>In der DKG e.V.</p> <p>Guideline Breast<br/>Version 2014.1</p> <p>www.ago-online.de</p> <p>Further Information</p> <p>References</p> <p>FORSCHEN<br/>LEHREN<br/>HEILEN</p> | > Use of silicone filled breast implants            | 2a                       | B | + |
|                                                                                                                                                                                                                                                                                                               | > Autologous tissue transfer reconstruction         | 2a                       | B | + |
|                                                                                                                                                                                                                                                                                                               | > Pedicled tissue transfer reconstruction           | 2a                       | B | + |
|                                                                                                                                                                                                                                                                                                               | > Free tissue transfer reconstruction               | 2a                       | B | + |
|                                                                                                                                                                                                                                                                                                               | > Autologous tissue transfer combined with implants | 3a                       | C | + |

**Attention: BMI >30, smoking status, Diabetes, RT, age**

Fig. 5. Postmastectomy reconstruction.

|                                                                     |  | Oxford | AGO  |
|---------------------------------------------------------------------|--|--------|------|
|                                                                     |  | LoE    | GR   |
| > alternative methods (CAM) instead of surgical treatment           |  |        | --   |
| > alternative methods (CAM) instead of systemic treatment           |  | 2b     | B -- |
| > While on anti-cancer treatment: beware of drug interactions       |  |        |      |
| > CAM after completion of primary treatment in order improve OS/DFS |  |        |      |
| > (beware of drug interactions)                                     |  |        |      |
| > For specific interventions refer to slides below                  |  |        |      |

Fig. 6. Fundamental considerations in integrative oncology.

## References

- 1 Oxford CEBM: Level of evidence, LoE, [www.cebm.net](http://www.cebm.net).
- 2 Empfehlungen Gynäkologische Onkologie Kommission Mamma, 2015, [www.ago-online.de](http://www.ago-online.de).
- 3 Ritte R, Tikk K, Lukanova A, Tjonneland A, Olsen A, Overvad K, Dossus L, Fournier A, Clavel-Chapelon F, Grote V, Boeing H, Aleksandrova K, Trichopoulou A, Lagiou P, Trichopoulos D, Palli D, Berrino F, Mattiello A, Tumino R, Sacerdote C, Quiros JR, Buckland G, Molina-Montes E, Chirlaque MD, Ardanaz E, Amiano P, Bueno-de-Mesquita HB, van Gils CH, Peeters PH, Wareham N, Khaw KT, Key TJ, Travis RC, Weiderpass E, Dumeaux V, Lund E, Sund M, Andersson A, Romieu I, Rinaldi S, Vineis P, Merritt MA, Riboli E, Kaaks R: Reproductive factors and risk of hormone receptor positive and negative breast cancer: a cohort study. *BMC Cancer* 2013;13:584.
- 4 Gonzalez CA, Riboli E: Diet and cancer prevention: contributions from the European Prospective Investigation into Cancer and Nutrition (EPIC) study. *Eur J Cancer* 2010;46:2555–2562.
- 5 Chlebowski RT, McTiernan A, Wactawski-Wende J, Manson JE, Aragaki AK, Rohan T, Ipp E, Kaklamani VG, Vitolins M, Wallace R, Gunter M, Phillips LS, Strickler H, Margolis K, Euhus DM: Diabetes, metformin, and breast cancer in postmenopausal women. *J Clin Oncol* 2012;30:2844–2852.
- 6 McDonald JA, Goyal A, Terry MB: Alcohol intake and breast cancer risk: weighing the overall evidence. *Curr Breast Cancer Rep* 2013;5 (3).
- 7 Dossus L, Boutron-Ruault MC, Kaaks R, Gram IT, Vilier A, Fervers B, Manjer J, Tjonneland A, Olsen A, Overvad K, Chang-Claude J, Boeing H, Steffen A, Trichopoulou A, Lagiou P, Sarantopoulou M, Palli D, Berrino F, Tumino R, Vineis P, Mattiello A, Bueno-de-Mesquita HB, van Duijnhoven FJ, Bakker MF, Peeters PH, Weiderpass E, Bjerkaas E, Braaten T, Menendez V, Agudo A, Sanchez MJ, Amiano P, Tormo MJ, Barricarte A, Butt S, Khaw KT, Wareham N, Key TJ, Travis RC, Rinaldi S, McCormack V, Romieu I, Cox DG, Norat T, Riboli E, Clavel-Chapelon F: Active and passive cigarette smoking and breast cancer risk: results from the EPIC cohort. *Int J Cancer* 2014;134:1871–1888.
- 8 Gaudet MM, Gapstur SM, Sun J, Diver WR, Hannan LM, Thun MJ: Active smoking and breast cancer risk: original cohort data and meta-analysis. *J Natl Cancer Inst* 2013;105:515–525.

- 9 Checkliste zur Erfassung einer möglichen erblichen Belastung für Brust- und/oder Eierstockkrebs,  
[http://www.aekwl.de/fileadmin/qualitaetssicherung/Zertifizierungsstelle/FB-erbliche\\_Belastung\\_V2014-12-16.pdf](http://www.aekwl.de/fileadmin/qualitaetssicherung/Zertifizierungsstelle/FB-erbliche_Belastung_V2014-12-16.pdf)
- 10 Couch FJ, Hart SN, Sharma P, Toland AE, Wang X, Miron P, Olson JE, Godwin AK, Pankratz VS, Olswold C, Slettedahl S, Hallberg E, Guidugli L, Davila JI, Beckmann MW, Janni W, Rack B, Ekici AB, Slamon DJ, Konstantopoulou I, Fostira F, Vratimos A, Fountzilas G, Pelttari LM, Tapper WJ, Durcan L, Cross SS, Pilarski R, Shapiro CL, Klemp J, Yao S, Garber J, Cox A, Brauch H, Ambrosone C, Nevanlinna H, Yannoukakos D, Slager SL, Vachon CM, Eccles DM, Fasching PA: Inherited mutations in 17 breast cancer susceptibility genes among a large triple-negative breast cancer cohort unselected for family history of breast cancer. *J Clin Oncol* 2015;33:304–311.
- 11 Gaudet MM, Kuchenbaecker KB, Vijai J, Klein RJ, Kirchhoff T, McGuffog L, Barrowdale D, Dunning AM, Lee A, Dennis J, Healey S, Dicks E, Soucy P, Sinilnikova OM, Pankratz VS, Wang X, Eldridge RC, Tessier DC, Vincent D, Bacot F, Hogervorst FB, Peock S, Stoppa-Lyonnet D, Peterlongo P, Schmutzler RK, Nathanson KL, Piedmonte M, Singer CF, Thomassen M, Hansen T, Neuhausen SL, Blanco I, Greene MH, Garber J, Weitzel JN, Andrulis IL, Goldgar DE, D'Andrea E, Caldes T, Nevanlinna H, Osorio A, van Rensburg EJ, Arason A, Rennert G, van den Ouweland AM, van der Hout AH, Kets CM, Aalfs CM, Wijnen JT, Ausems MG, Frost D, Ellis S, Fineberg E, Platte R, Evans DG, Jacobs C, Adlard J, Tischkowitz M, Porteous ME, Damiola F, Golmard L, Barjhoux L, Longy M, Belotti M, Ferrer SF, Mazoyer S, Spurdle AB, Manoukian S, Barile M, Genuardi M, Arnold N, Meindl A, Sutter C, Wappenschmidt B, Domchek SM, Pfeiler G, Friedman E, Jensen UB, Robson M, Shah S, Lazaro C, Mai PL, Benitez J, Southey MC, Schmidt MK, Fasching PA, Peto J, Humphreys MK, Wang Q, Michailidou K, Sawyer EJ, Burwinkel B, Guenel P, Bojesen SE, Milne RL, Brenner H, Lochmann M, Aittomaki K, Dork T, Margolin S, Mannermaa A, Lambrechts D, Chang-Claude J, Radice P, Giles GG, Haiman CA, Winqvist R, Devilee P, Garcia-Closas M, Schoof N, Hooning MJ, Cox A, Pharoah PD, Jakubowska A, Orr N, Gonzalez-Neira A, Pita G, Alonso MR, Hall P, Couch FJ, Simard J, Altshuler D, Easton DF, Chenevix-Trench G, Antoniou



AC, Offit K: Identification of a BRCA2-specific modifier locus at 6p24 related to breast cancer risk. *PLoS Genet* 2013;9:e1003173.

- 12 Couch FJ, Wang X, McGuffog L, Lee A, Olswold C, Kuchenbaecker KB, Soucy P, Fredericksen Z, Barrowdale D, Dennis J, Gaudet MM, Dicks E, Kosel M, Healey S, Sinilnikova OM, Lee A, Bacot F, Vincent D, Hogervorst FB, Peock S, Stoppa-Lyonnet D, Jakubowska A, Radice P, Schmutzler RK, Domchek SM, Piedmonte M, Singer CF, Friedman E, Thomassen M, Hansen TV, Neuhausen SL, Szabo CI, Blanco I, Greene MH, Karlan BY, Garber J, Phelan CM, Weitzel JN, Montagna M, Olah E, Andrulis IL, Godwin AK, Yannoukakos D, Goldgar DE, Caldes T, Nevanlinna H, Osorio A, Terry MB, Daly MB, van Rensburg EJ, Hamann U, Ramus SJ, Toland AE, Caligo MA, Olopade OI, Tung N, Claes K, Beattie MS, Southey MC, Imyanitov EN, Tischkowitz M, Janavicius R, John EM, Kwong A, Diez O, Balmana J, Barkardottir RB, Arun BK, Rennert G, Teo SH, Ganz PA, Campbell I, van der Hout AH, van Deurzen CH, Seynaeve C, Gomez Garcia EB, van Leeuwen FE, Meijers-Heijboer HE, Gille JJ, Ausems MG, Blok MJ, Ligtenberg MJ, Rookus MA, Devilee P, Verhoef S, van Os TA, Wijnen JT, Frost D, Ellis S, Fineberg E, Platte R, Evans DG, Izatt L, Eeles RA, Adlard J, Eccles DM, Cook J, Brewer C, Douglas F, Hodgson S, Morrison PJ, Side LE, Donaldson A, Houghton C, Rogers MT, Dorkins H, Eason J, Gregory H, McCann E, Murray A, Calender A, Hardouin A, Berthet P, Delnatte C, Nogues C, Lasset C, Houdayer C, Leroux D, Rouleau E, Prieur F, Damiola F, Sobol H, Coupier I, Venat-Bouvet L, Castera L, Gauthier-Villars M, Leone M, Pujol P, Mazoyer S, Bignon YJ, Zlowocka-Perlowska E, Gronwald J, Lubinski J, Durda K, Jaworska K, Huzarski T, Spurdle AB, Viel A, Peissel B, Bonanni B, Melloni G, Ottini L, Papi L, Varesco L, Tibiletti MG, Peterlongo P, Volorio S, Manoukian S, Pensotti V, Arnold N, Engel C, Deissler H, Gadzicki D, Gehrig A, Kast K, Rhiem K, Meindl A, Niederacher D, Ditsch N, Plendl H, Preisler-Adams S, Engert S, Sutter C, Varon-Mateeva R, Wappenschmidt B, Weber BH, Arver B, Stenmark-Askmal M, Loman N, Rosenquist R, Einbeigi Z, Nathanson KL, Rebbeck TR, Blank SV, Cohn DE, Rodriguez GC, Small L, Friedlander M, Bae-Jump VL, Fink-Retter A, Rappaport C, Gschwantler-Kaulich D, Pfeiler G, Tea MK, Lindor NM, Kaufman B, Shimon Paluch S, Laitman Y, Skytte AB, Gerdes AM, Pedersen IS, Moeller ST, Kruse TA, Jensen UB, Vijai J, Sarrel K, Robson M, Kauff N, Mulligan AM, Glendon G, Ozcelik H, Ejlersen B, Nielsen FC,

- Jonson L, Andersen MK, Ding YC, Steele L, Foretova L, Teule A, Lazaro C, Brunet J, Pujana MA, Mai PL, Loud JT, Walsh C, Lester J, Orsulic S, Narod SA, Herzog J, Sand SR, Tognazzo S, Agata S, Vaszko T, Weaver J, Stavropoulou AV, Buys SS, Romero A, de la Hoya M, Aittomaki K, Muranen TA, Duran M, Chung WK, Lasa A, Dorfling CM, Miron A, Benitez J, Senter L, Huo D, Chan SB, Sokolenko AP, Chiquette J, Tihomirova L, Friebel TM, Agnarsson BA, Lu KH, Lejbkowitz F, James PA, Hall P, Dunning AM, Tessier D, Cunningham J, Slager SL, Wang C, Hart S, Stevens K, Simard J, Pastinen T, Pankratz VS, Offit K, Easton DF, Chenevix-Trench G, Antoniou AC: Genome-wide association study in BRCA1 mutation carriers identifies novel loci associated with breast and ovarian cancer risk. *PLoS Genet* 2013;9:e1003212.
- 13 Antoniou AC, Casadei S, Heikkinen T, Barrowdale D, Pylkas K, Roberts J, Lee A, Subramanian D, De Leeneer K, Fostira F, Tomiak E, Neuhausen SL, Teo ZL, Khan S, Aittomaki K, Moilanen JS, Turnbull C, Seal S, Mannermaa A, Kallioniemi A, Lindeman GJ, Buys SS, Andrulis IL, Radice P, Tondini C, Manoukian S, Toland AE, Miron P, Weitzel JN, Domchek SM, Poppe B, Claes KB, Yannoukakos D, Concannon P, Bernstein JL, James PA, Easton DF, Goldgar DE, Hopper JL, Rahman N, Peterlongo P, Nevanlinna H, King MC, Couch FJ, Southey MC, Winqvist R, Foulkes WD, Tischkowitz M: Breast-cancer risk in families with mutations in PALB2. *N Engl J Med* 2014;371:497–506.
- 14 Tutt A, Ellis P, Kilburn L, et al.: The TNT trial: a randomized phase III trial of carboplatin (C) compared with docetaxel (D) for patients with metastatic or recurrent locally advanced triple negative or BRCA1/2 breast cancer (CRUK/07/012). *San Antonio Breast Cancer Symposium* 2014;abstr S3–01.
- 15 Caumo F, Bernardi D, Ciatto S, Macaskill P, Pellegrini M, Brunelli S, Tuttobene P, Bricolo P, Fanto C, Valentini M, Montemezzi S, Houssami N: Incremental effect from integrating 3D-mammography (tomosynthesis) with 2D-mammography: increased breast cancer detection evident for screening centres in a population-based trial. *Breast (Edinburgh)* 2014;23:76–80.
- 16 Zuley ML, Bandos AI, Ganott MA, Sumkin JH, Kelly AE, Catullo VJ, Rathfon GY, Lu AH, Gur D: Digital breast tomosynthesis versus supplemental diagnostic mammographic views for evaluation of noncalcified breast lesions. *Radiology* 2013;266:89–95.

- 17 Gartlehner G, Thaler K, Chapman A, Kaminski-Hartenthaler A, Berzaczy D, Van Noord MG, Helbich TH: Mammography in combination with breast ultrasonography versus mammography for breast cancer screening in women at average risk. *Cochrane Database Syst Rev* 2013;(4):CD009632.
- 18 Golatta M, Baggs C, Schweitzer-Martin M, Domschke C, Schott S, Harcos A, Scharf A, Junkermann H, Rauch G, Rom J, Sohn C, Heil J: Evaluation of an automated breast 3D-ultrasound system by comparing it with hand-held ultrasound (HHUS) and mammography. *Arch Gynecol Obstet* 2015;291:889–895.
- 19 Li G, Li DW, Fang YX, Song YJ, Deng ZJ, Gao J, Xie Y, Yin TS, Ying L, Tang KF: Performance of shear wave elastography for differentiation of benign and malignant solid breast masses. *PLoS One* 2013;8:e76322.
- 20 Houssami N, Turner R, Macaskill P, Turnbull LW, McCready DR, Tuttle TM, Vapiwala N, Solin LJ: An individual person data meta-analysis of preoperative magnetic resonance imaging and breast cancer recurrence. *J Clin Oncol* 2014;32:392–401.
- 21 Evans A, Rauchhaus P, Whelehan P, Thomson K, Purdie CA, Jordan LB, Michie CO, Thompson A, Vinnicombe S: Does shear wave ultrasound independently predict axillary lymph node metastasis in women with invasive breast cancer? *Breast Cancer Res Treat* 2014;143:153–157.
- 22 Diepstraten SC, Sever AR, Buckens CF, Veldhuis WB, van Dalen T, van den Bosch MA, Mali WP, Verkooijen HM: Value of preoperative ultrasound-guided axillary lymph node biopsy for preventing completion axillary lymph node dissection in breast cancer: a systematic review and meta-analysis. *Ann Surg Oncol* 2014;21:51–59.
- 23 Ragage F, Debled M, MacGrogan G, Brouste V, Desrousseaux M, Soubeyran I, de Lara CT, Mauriac L, de Mascarel I: Is it useful to detect lymphovascular invasion in lymph node-positive patients with primary operable breast cancer? *Cancer* 2010;116:3093–3101.
- 24 Kalkman S, Barentsz MW, van Diest PJ: The effects of under 6 hours of formalin fixation on hormone receptor and HER2 expression in invasive breast cancer: a systematic review. *Am J Clin Pathol* 2014;142:16–22.

- 25 Lee AH, Key HP, Bell JA, Kumah P, Hodi Z, Ellis IO: The effect of delay in fixation on HER2 expression in invasive carcinoma of the breast assessed with immunohistochemistry and in situ hybridisation. *J Clin Pathol* 2014;67:573–575.
- 26 Varma S, Ozerdem U, Hoda SA: Complexities and challenges in the pathologic assessment of size (T) of invasive breast carcinoma. *Adv Anat Pathol* 2014;21:420–432.
- 27 Tot T, Gere M, Pekar G, Tarjan M, Hofmeyer S, Hellberg D, Lindquist D, Chen TH, Yen AM, Chiu SY, Tabar L: Breast cancer multifocality, disease extent, and survival. *Hum Pathol* 2011;42:1761–1769.
- 28 Moran MS, Schnitt SJ, Giuliano AE, Harris JR, Khan SA, Horton J, Klimberg S, Chavez-MacGregor M, Freedman G, Houssami N, Johnson PL, Morrow M: Society of Surgical Oncology-American Society for Radiation Oncology consensus guideline on margins for breast-conserving surgery with whole-breast irradiation in stages I and II invasive breast cancer. *Int J Radiat Oncol Biol Phys* 2014;88:553–564.
- 31 Gujam FJ, Going JJ, Edwards J, Mohammed ZM, McMillan DC: The role of lymphatic and blood vessel invasion in predicting survival and methods of detection in patients with primary operable breast cancer. *Crit Rev Oncol Hematol* 2014;89:231–241.
- 32 Salgado R, Denkert C, Demaria S, Sirtaine N, Klauschen F, Pruneri G, Wienert S, Van den Eynden G, Baehner FL, Penault-Llorca F, Perez EA, Thompson EA, Symmans WF, Richardson AL, Brock J, Criscitiello C, Bailey H, Ignatiadis M, Floris G, Sparano J, Kos Z, Nielsen T, Rimm DL, Allison KH, Reis-Filho JS, Loibl S, Sotiriou C, Viale G, Badve S, Adams S, Willard-Gallo K, Loi S: The evaluation of tumor-infiltrating lymphocytes (TILs) in breast cancer: recommendations by an International TILs Working Group 2014. *Ann Oncol* 2015;26:259–271.
- 33 Denkert C, von Minckwitz G, Brase JC, Sinn BV, Gade S, Kronenwett R, Pfitzner BM, Salat C, Loi S, Schmitt WD, Schem C, Fisch K, Darb-Esfahani S, Mehta K, Sotiriou C, Wienert S, Klare P, Andre F, Klauschen F, Blohmer JU, Krappmann K, Schmidt M, Tesch H, Kummel S, Sinn P, Jackisch C, Dietel M, Reimer T, Untch M, Loibl S: Tumor-infiltrating lymphocytes and response to neoadjuvant chemotherapy with or without carboplatin in human epidermal

- growth factor receptor 2-positive and triple-negative primary breast cancers. *J Clin Oncol* 2015;33:983–991.
- 34 Sahoo S, Lester SC: Pathology of breast carcinomas after neoadjuvant chemotherapy: an overview with recommendations on specimen processing and reporting. *Arch Pathol Lab Med* 2009;133:633–642.
- 35 Sheri A, Smith IE, Johnston SR, A'Hern R, Nerurkar A, Jones RL, Hills M, Detre S, Pinder SE, Symmans WF, Dowsett M: Residual proliferative cancer burden to predict long-term outcome following neoadjuvant chemotherapy. *Ann Oncol* 2015;26:75–80.
- 36 Symmans WF, Peintinger F, Hatzis C, Rajan R, Kuerer H, Valero V, Assad L, Poniecka A, Hennessy B, Green M, Buzdar AU, Singletary SE, Hortobagyi GN, Pusztai L: Measurement of residual breast cancer burden to predict survival after neoadjuvant chemotherapy. *J Clin Oncol* 2007;25:4414–4422.
- 37 Gloyeske NC, Dabbs DJ, Bhargava R: Low ER+ breast cancer: Is this a distinct group? *Am J Clin Pathol* 2014;141:697–701.
- 38 Prat A, Cheang MC, Martin M, Parker JS, Carrasco E, Caballero R, Tyldesley S, Gelmon K, Bernard PS, Nielsen TO, Perou CM: Prognostic significance of progesterone receptor-positive tumor cells within immunohistochemically defined luminal A breast cancer. *J Clin Oncol* 2013;31:203–209.
- 39 Hefti MM, Hu R, Knoblauch NW, Collins LC, Haibe-Kains B, Tamimi RM, Beck AH: Estrogen receptor negative/progesterone receptor positive breast cancer is not a reproducible subtype. *Breast Cancer Res* 2013;15:R68.
- 40 Viale G, Slaets L, Bogaerts J, Rutgers E, van't Veer L, Piccart-Gebhart MJ, de Snoo FA, Stork-Sloots L, Russo L, Dell'Orto P, van den Akker J, Glas A, Cardoso F: High concordance of protein (by IHC), gene (by FISH; HER2 only), and microarray readout (by target print) of ER, PgR, and HER2: results from the EORTC 10041/BIG 03–04 MINDACT trial. *Ann Oncol* 2014;25:816–823.
- 41 Horvath A, Pakala SB, Mudvari P, Reddy SD, Ohshiro K, Casimiro S, Pires R, Fuqua SA, Toi M, Costa L, Nair SS, Sukumar S, Kumar R: Novel insights into breast cancer genetic variance through RNA sequencing. *Sci Rep* 2013;3:2256.
- 42 Denkert C, Huober J, Loibl S, Prinzler J, Kronenwett R, Darb-Esfahani S, Brase JC, Solbach C, Mehta K, Fasching PA, Sinn BV, Engels K, Reinisch M, Hansmann ML, Tesch H, von Minckwitz G, Untch M: HER2 and ESR1 mRNA

- expression levels and response to neoadjuvant trastuzumab plus chemotherapy in patients with primary breast cancer. *Breast Cancer Res* 2013;15:R11.
- 43 Polley MY, Leung SC, McShane LM, Gao D, Hugh JC, Mastropasqua MG, Viale G, Zabaglo LA, Penault-Llorca F, Bartlett JM, Gown AM, Symmans WF, Piper T, Mehl E, Enos RA, Hayes DF, Dowsett M, Nielsen TO: An international Ki67 reproducibility study. *J Natl Cancer Inst* 2013;105:1897–1906.
- 44 Dyhdalo KS, Fitzgibbons PL, Goldsmith JD, Souers RJ, Nakhleh RE: Laboratory compliance with the American Society of Clinical Oncology/College of American Pathologists human epidermal growth factor receptor 2 testing guidelines: a 3-year comparison of validation procedures. *Arch Pathol Lab Med* 2014;138:876–884.
- 45 Perry N, Broeders M, de Wolf C, Tornberg S, Holland R, von Karsa L: European guidelines for quality assurance in breast cancer screening and diagnosis. Fourth edition – summary document. *Ann Oncol* 2008;19:614–622.
- 46 Liedtke C, Thill M, Hanf V, Schutz F: AGO recommendations for the diagnosis and treatment of patients with early breast cancer: update 2014. *Breast Care* 2014;9:189–200.
- 47 Houssami N, Ciatto S, Bilous M, Vezzosi V, Bianchi S: Borderline breast core needle histology: predictive values for malignancy in lesions of uncertain malignant potential (B3). *Br J Cancer* 2007;96:1253–1257.
- 48 Shamonki J, Chung A, Huynh KT, Sim MS, Kinnaird M, Giuliano A: Management of papillary lesions of the breast: Can larger core needle biopsy samples identify patients who may avoid surgical excision? *Ann Surg Oncol* 2013;20:4137–4144.
- 49 Swapp RE, Glazebrook KN, Jones KN, Brandts HM, Reynolds C, Visscher DW, Hieken TJ: Management of benign intraductal solitary papilloma diagnosed on core needle biopsy. *Ann Surg Oncol* 2013;20:1900–1905.
- 50 Wyss P, Varga Z, Rossle M, Rageth CJ: Papillary lesions of the breast: outcomes of 156 patients managed without excisional biopsy. *Breast J* 2014;20:394–401.
- 51 Neal L, Sandhu NP, Hieken TJ, Glazebrook KN, Mac Bride MB, Dilaveri CA, Wahner-Roedler DL, Ghosh K, Visscher DW: Diagnosis and management of benign, atypical, and indeterminate breast lesions detected on core needle biopsy. *Mayo Clinic Proc* 2014;89:536–547.

- 52 Harbeck N, Schmitt M, Meisner C, Friedel C, Untch M, Schmidt M, Sweep CG, Lisboa BW, Lux MP, Beck T, Hasmuller S, Kiechle M, Janicke F, Thomssen C: Ten-year analysis of the prospective multicentre Chemo-N0 trial validates American Society of Clinical Oncology (ASCO)-recommended biomarkers uPA and PAI-1 for therapy decision making in node-negative breast cancer patients. *Eur J Cancer* 2013;49:1825–1835.
- 53 Liu S, Chapman JA, Burnell MJ, Levine MN, Pritchard KI, Whelan TJ, Rugo HS, Albain KS, Perez EA, Virk S, Barry G, Gao D, O'Brien P, Shepherd LE, Nielsen TO, Gelmon KA: Prognostic and predictive investigation of PAM50 intrinsic subtypes in the NCIC CTG MA.21 phase III chemotherapy trial. *Breast Cancer Res Treat* 2015;149:439–448.
- 54 Sestak I, Cuzick J, Dowsett M, Lopez-Knowles E, Filipits M, Dubsy P, Cowens JW, Ferree S, Schaper C, Fesl C, Gnant M: Prediction of late distant recurrence after 5 years of endocrine treatment: a combined analysis of patients from the Austrian Breast and Colorectal Cancer Study Group 8 and Arimidex, Tamoxifen Alone or in Combination randomized trials using the PAM50 risk of recurrence score. *J Clin Oncol* 2015;33:916–922.
- 55 Rastogi P, Anderson SJ, Bear HD, Geyer CE, Kahlenberg MS, Robidoux A, Margolese RG, Hoehn JL, Vogel VG, Dakhil SR, Tamkus D, King KM, Pajon ER, Wright MJ, Robert J, Paik S, Mamounas EP, Wolmark N: Preoperative chemotherapy: updates of National Surgical Adjuvant Breast and Bowel Project protocols B-18 and B-27. *J Clin Oncol* 2008;26:778–785.
- 56 Loibl S, Volz C, Mau C, Blohmer JU, Costa SD, Eidtmann H, Fasching PA, Gerber B, Hanusch C, Jackisch C, Kummel S, Huober J, Denkert C, Hilfrich J, Konecny GE, Fett W, Stickeler E, Harbeck N, Mehta KM, Nekljudova V, von Minckwitz G, Untch M: Response and prognosis after neoadjuvant chemotherapy in 1,051 patients with infiltrating lobular breast carcinoma. *Breast Cancer Res Treat* 2014;144:153–162.
- 57 Untch M, von Minckwitz G: Neoadjuvant chemotherapy: early response as a guide for further treatment: clinical, radiological, and biological. *J Natl Cancer Inst Monogr* 2011;2011:138–141.
- 58 Huober J, von Minckwitz G, Denkert C, Tesch H, Weiss E, Zahm DM, Belau A, Khandan F, Hauschild M, Thomssen C, Hogel B, Darb-Esfahani S, Mehta K, Loibl S: Effect of neoadjuvant anthracycline-taxane-based chemotherapy in

- different biological breast cancer phenotypes: overall results from the GeparTrio study. *Breast Cancer Res Treat* 2010;124:133–140.
- 59 Byrski T, Huzarski T, Dent R, Marczyk E, Jasiowka M, Gronwald J, Jakubowicz J, Cybulski C, Wisniowski R, Godlewski D, Lubinski J, Narod SA: Pathologic complete response to neoadjuvant cisplatin in BRCA1-positive breast cancer patients. *Breast Cancer Res Treat* 2014;147:401–405.
- 60 von Minckwitz G, Schneeweiss A, Loibl S, Salat C, Denkert C, Rezai M, Blohmer JU, Jackisch C, Paepke S, Gerber B, Zahm DM, Kümmel S, Eidtmann H, Klare P, Huober J, Costa S, Tesch H, Hanusch C, Hilfrich J, Khandan F, Fasching PA, Sinn BV, Engels K, Mehta K, Nekljudova V, Untch M: Neoadjuvant carboplatin in patients with triple-negative and HER2-positive early breast cancer (GeparSixto; GBG 66): a randomised phase 2 trial. *Lancet Oncol* 2014;15:747–756.
- 61 Ando M, Yamauchi H, Aogi K, Shimizu S, Iwata H, Masuda N, Yamamoto N, Inoue K, Ohono S, Kuroi K, Hamano T, Sukigara T, Fujiwara Y: Randomized phase II study of weekly paclitaxel with and without carboplatin followed by cyclophosphamide/epirubicin/5-fluorouracil as neoadjuvant chemotherapy for stage II/IIIA breast cancer without HER2 overexpression. *Breast Cancer Res Treat* 2014;145:401–409.
- 62 Petrelli F, Coinu A, Borgonovo K, Cabiddu M, Ghilardi M, Lonati V, Barni S: The value of platinum agents as neoadjuvant chemotherapy in triple-negative breast cancers: a systematic review and meta-analysis. *Breast Cancer Res Treat* 2014;144:223–232.
- 63 Sikov WM, Berry DA, Perou CM, Singh B, Cirrincione CT, Tolaney SM, Kuzma CS, Pluard TJ, Somlo G, Port ER, Golshan M, Bellon JR, Collyar D, Hahn OM, Carey LA, Hudis CA, Winer EP: Impact of the addition of carboplatin and/or bevacizumab to neoadjuvant once-per-week paclitaxel followed by dose-dense doxorubicin and cyclophosphamide on pathologic complete response rates in stage II to III triple-negative breast cancer: CALGB 40603 (Alliance). *J Clin Oncol* 2015;33:13–21.
- 64 von Minckwitz G, Kummel S, Vogel P, Hanusch C, Eidtmann H, Hilfrich J, Gerber B, Huober J, Costa SD, Jackisch C, Loibl S, Mehta K, Kaufmann M: Neoadjuvant vinorelbine-capecitabine versus docetaxel-doxorubicin-



- cyclophosphamide in early nonresponsive breast cancer: phase III randomized GeparTrio trial. *J Natl Cancer Inst* 2008;100:542–551.
- 65 von Minckwitz G, Blohmer JU, Costa SD, Denkert C, Eidtmann H, Eiermann W, Gerber B, Hanusch C, Hilfrich J, Huober J, Jackisch C, Kaufmann M, Kummel S, Paepke S, Schneeweiss A, Untch M, Zahm DM, Mehta K, Loibl S: Response-guided neoadjuvant chemotherapy for breast cancer. *J Clin Oncol* 2013;31:3623–3630.
- 66 Mao Y, Qu Q, Zhang Y, Liu J, Chen X, Shen K: The value of tumor infiltrating lymphocytes (TILs) for predicting response to neoadjuvant chemotherapy in breast cancer: a systematic review and meta-analysis. *PLoS One* 2014;9:e115103.
- 67 Loibl S, von Minckwitz G, Schneeweiss A, Paepke S, Lehmann A, Rezai M, Zahm DM, Sinn P, Khandan F, Eidtmann H, Dohnal K, Heinrichs C, Huober J, Pfitzner B, Fasching PA, Andre F, Lindner JL, Sotiriou C, Dykgers A, Guo S, Gade S, Nekljudova V, Loi S, Untch M, Denkert C: PIK3CA mutations are associated with lower rates of pathologic complete response to anti-human epidermal growth factor receptor 2 (HER2) therapy in primary HER2-overexpressing breast cancer. *J Clin Oncol* 2014;32:3212–3220.
- 68 Ataseven B, Lederer B, Blohmer JU, Denkert C, Gerber B, Heil J, Kuhn T, Kummel S, Rezai M, Loibl S, von Minckwitz G: Impact of multifocal or multicentric disease on surgery and locoregional, distant and overall survival of 6,134 breast cancer patients treated with neoadjuvant chemotherapy. *Ann Surg Oncol* 2015;22:1118–1127.
- 69 Pilewskie M, Ho A, Orell E, Stempel M, Chen Y, Eaton A, Patil S, Morrow M: Effect of margin width on local recurrence in triple-negative breast cancer patients treated with breast-conserving therapy. *Ann Surg Oncol* 2014;21:1209–1214.
- 70 Ahmed M, Douek M: Intra-operative ultrasound versus wire-guided localization in the surgical management of non-palpable breast cancers: systematic review and meta-analysis. *Breast Cancer Res Treat* 2013;140:435–446.
- 71 Pan H, Wu N, Ding H, Ding Q, Dai J, Ling L, Chen L, Zha X, Liu X, Zhou W, Wang S: Intraoperative ultrasound guidance is associated with clear lumpectomy margins for breast cancer: a systematic review and meta-analysis. *PLoS One* 2013;8:e74028.

- 72 Veronesi U, Viale G, Paganelli G, Zurrada S, Luini A, Galimberti V, Veronesi P, Intra M, Maisonneuve P, Zucca F, Gatti G, Mazzarol G, De Cicco C, Vezzoli D: Sentinel lymph node biopsy in breast cancer: ten-year results of a randomized controlled study. *Ann Surg* 2010;251:595–600.
- 73 Boughey JC, Suman VJ, Mittendorf EA, Ahrendt GM, Wilke LG, Taback B, Leitch AM, Kuerer HM, Bowling M, Flippo-Morton TS, Byrd DR, Ollila DW, Julian TB, McLaughlin SA, McCall L, Symmans WF, Le-Petross HT, Haffty BG, Buchholz TA, Nelson H, Hunt KK; Alliance for Clinical Trials in Oncology: Sentinel lymph node surgery after neoadjuvant chemotherapy in patients with node-positive breast cancer: the ACOSOG Z1071 (Alliance) clinical trial. *JAMA* 2013;310:1455–1461.
- 74 Kühn T, Bauerfeind I, Fehm T, Fleige B, Hausschild M, Helms G, Lebeau A, Liedtke C, von Minckwitz G, Nekljudova V, Schmatloch S, Schrenk P, Staebler A, Untch M: Sentinel-lymph-node biopsy in patients with breast cancer before and after neoadjuvant chemotherapy (SENTINA): a prospective, multicentre cohort study. *Lancet Oncol* 2013;14:609–618.
- 75 Fu JF, Chen HL, Yang J, Yi CH, Zheng S: Feasibility and accuracy of sentinel lymph node biopsy in clinically node-positive breast cancer after neoadjuvant chemotherapy: a meta-analysis. *PLoS One* 2014;9:e105316.
- 76 Boileau JF, Poirier B, Basik M, Holloway CM, Gaboury L, Sideris L, Meterissian S, Arnaout A, Brackstone M, McCready DR, Karp SE, Trop I, Lisbona A, Wright FC, Younan RJ, Provencher L, Patocskai E, Omeroglu A, Robidoux A: Sentinel node biopsy after neoadjuvant chemotherapy in biopsy-proven node-positive breast cancer: the SN FNAC study. *J Clin Oncol* 2015;33:258–264.
- 77 Thill M, Kurylcio A, Welter R, van Haasteren V, Grosse B, Berclaz G, Polkowski W, Hauser N: The Central-European SentiMag study: sentinel lymph node biopsy with superparamagnetic iron oxide (SPIO) vs. radioisotope. *Breast (Edinburgh)* 2014;23:175–179.
- 78 Samorani D, Fogacci T, Panzini I, Frisoni G, Accardi FG, Ricci M, Fabbri E, Nicoletti S, Flenghi L, Tamburini E, Tassinari D, Gianni L: The use of indocyanine green to detect sentinel nodes in breast cancer: a prospective study. *Eur J Surg Oncol* 2015;41:64–70.
- 79 EBCTCG (Early Breast Cancer Trialists' Collaborative Group), McGale P, Taylor C, Correa C, Cutter D, Duane F, Ewertz M, Gray R, Mannu G, Peto R,

- Whelan T, Wang Y, Wang Z, Darby S: Effect of radiotherapy after mastectomy and axillary surgery on 10-year recurrence and 20-year breast cancer mortality: meta-analysis of individual patient data for 8135 women in 22 randomised trials. *Lancet* 2014;383:2127–2135.
- 80 Hughes KS, Schnaper LA, Bellon JR, Cirincione CT, Berry DA, McCormick B, Muss HB, Smith BL, Hudis CA, Winer EP, Wood WC: Lumpectomy plus tamoxifen with or without irradiation in women age 70 years or older with early breast cancer: long-term follow-up of CALGB 9343. *J Clin Oncol* 2013;31:2382–2387.
- 81 Haviland JS, Owen JR, Dewar JA, Agrawal RK, Barrett J, Barrett-Lee PJ, Dobbs HJ, Hopwood P, Lawton PA, Magee BJ, Mills J, Simmons S, Sydenham MA, Venables K, Bliss JM, Yarnold JR: The UK Standardisation of Breast Radiotherapy (START) trials of radiotherapy hypofractionation for treatment of early breast cancer: 10-year follow-up results of two randomised controlled trials. *Lancet Oncol* 2013;14:1086–1094.
- 82 Whelan T, Ackerman I, Chapman J: NCIC-CTG MA.20: An Intergroup Trial of Regional Nodal Irradiation in Early Breast Cancer. *J Clin Oncol* 2011;29(suppl):abstr.
- 83 Poortmans P, Kirkove C, Budach V: Irradiation of the internal mammary and medial supraclavicular lymph nodes in stage I–II breast cancer: 10 years results of the EORTC Radiation Oncology and Breast Cancer Groups Phase III trial 22922/10925: *Eur J Cancer* 2013;47(suppl 2):abstr.
- 84 Davies C, Pan H, Godwin J, Gray R, Arriagada R, Raina V, Abraham M, Medeiros Alencar VH, Badran A, Bonfill X, Bradbury J, Clarke M, Collins R, Davis SR, Delmestri A, Forbes JF, Haddad P, Hou MF, Inbar M, Khaled H, Kielanowska J, Kwan WH, Mathew BS, Mittra I, Muller B, Nicolucci A, Peralta O, Pernas F, Petruzelka L, Pienkowski T, Radhika R, Rajan B, Rubach MT, Tort S, Urrutia G, Valentini M, Wang Y, Peto R: Long-term effects of continuing adjuvant tamoxifen to 10 years versus stopping at 5 years after diagnosis of oestrogen receptor-positive breast cancer: ATLAS, a randomised trial. *Lancet* 2013;381:805–816.
- 85 Gray RG, Handley K, Bowden SJ: aTTom: Long-term effects of continuing adjuvant tamoxifen to 10 years versus stopping at 5 years in 6,953 women with

- early breast cancer. American Society of Clinical Oncology Annual Meeting 2013;abstr.
- 86 Goss PE, Ingle JN, Martino S, Robert NJ, Muss HB, Piccart MJ, Castiglione M, Tu D, Shepherd LE, Pritchard KI, Livingston RB, Davidson NE, Norton L, Perez EA, Abrams JS, Therasse P, Palmer MJ, Pater JL: A randomized trial of letrozole in postmenopausal women after five years of tamoxifen therapy for early-stage breast cancer. *N Engl J Med* 2003;349:1793–1802.
- 87 Pagani O, Regan MM, Walley BA, Fleming GF, Colleoni M, Lang I, Gomez HL, Tondini C, Burstein HJ, Perez EA, Ciruelos E, Stearns V, Bonnefoi HR, Martino S, Geyer CE Jr, Pinotti G, Puglisi F, Crivellari D, Ruhstaller T, Winer EP, Rabaglio-Poretti M, Maibach R, Ruepp B, Giobbie-Hurder A, Price KN, Bernhard J, Luo W, Ribí K, Viale G, Coates AS, Gelber RD, Goldhirsch A, Francis PA, et al.: Adjuvant exemestane with ovarian suppression in premenopausal breast cancer. *N Engl J Med* 2014;371:107–118.
- 88 Jacobs SA, Wilson JW, Bandos H, et al.: NSABP B-36: Randomized phase III trial comparing 6 cycles of 5-FU, epirubicin, and cyclophosphamide (FEC) to 4 cycles of AC in node-negative breast cancer: San Antonio Breast Cancer Symposium 2014;abstr.
- 89 Sparano JA, Zhao F, Martino S, Ligibel J, Saphner T, Wolff AC, Sledge GW, Perez EA, Wood WC, Davidson NE: Ten year update of e1199: phase III study of doxorubicin-cyclophosphamide followed by paclitaxel or docetaxel given every 3 weeks or weekly in patients with axillary node-positive or high-risk node-negative breast cancer. San Antonio Breast Cancer Symposium 2014;abstr.
- 90 Perrone F, Nuzzo F, Di Rella F, Gravina A, Iodice G, Labonia V, Landi G, Pacilio C, Rossi E, De Laurentiis M, D’Aiuto M, Botti G, Forestieri V, Lauria R, De Placido S, Tinessa V, Daniele B, Gori S, Colantuoni G, Barni S, Riccardi F, De Maio E, Montanino A, Morabito A, Daniele G, Di Maio M, Piccirillo MC, Signoriello S, Gallo C, de Matteis A: Weekly docetaxel versus CMF as adjuvant chemotherapy for older women with early breast cancer: final results of the randomized phase III ELDA trial. *Ann Oncol* 2015;26:675–682.
- 91 Amoroso V, Pedersini R, Sharratt P, Vassalli L, Ferrari L, Sigala S, Simoncini E, Berruti A: Should adjuvant weekly paclitaxel be considered less efficacious than

- anthracyclines plus cyclophosphamide for lower-risk patients with early-stage breast cancer? *J Clin Oncol* 2015;33:290.
- 92 Goldhirsch A, Gelber RD, Piccart-Gebhart MJ, de Azambuja E, Procter M, Suter TM, Jackisch C, Cameron D, Weber HA, Heinzmann D, Dal Lago L, McFadden E, Dowsett M, Untch M, Gianni L, Bell R, Kohne CH, Vindevoghel A, Andersson M, Brunt AM, Otero-Reyes D, Song S, Smith I, Leyland-Jones B, Baselga J: 2 years versus 1 year of adjuvant trastuzumab for HER2-positive breast cancer (HERA): an open-label, randomised controlled trial. *Lancet* 2013;382:1021–1028.
- 93 Pivot X, Romieu G, Debled M, Pierga JY, Kerbrat P, Bachelot T, Lortholary A, Espie M, Fumoleau P, Serin D, Jacquin JP, Jouannaud C, Rios M, Abadie-Lacourtoisie S, Tubiana-Mathieu N, Cany L, Catala S, Khayat D, Pauporte I, Kramar A: 6 months versus 12 months of adjuvant trastuzumab for patients with HER2-positive early breast cancer (PHARE): a randomised phase 3 trial. *Lancet Oncol* 2013;14:741–748.
- 94 Piccart-Gebhart M, Holmes AP, Baselga J, et al.: First results from the phase III ALTTO trial (BIG 02–06; NCCTG 063D) comparing one year of anti-HER2 therapy with lapatinib alone (L), trastuzumab alone (T), their sequence (T→L) or their combination (L + T) in the adjuvant treatment of HER2-positive early breast cancer (EBC): American Society of Clinical Oncology Annual Meeting 2014;abstr.
- 95 Tolaney SM, Barry WT, Dang CT, Yardley DA, Moy B, Marcom PK, Albain KS, Rugo HS, Ellis M, Shapira I, Wolff AC, Carey LA, Overmoyer BA, Partridge AH, Guo H, Hudis CA, Krop IE, Burstein HJ, Winer EP: Adjuvant paclitaxel and trastuzumab for node-negative, HER2-positive breast cancer. *N Engl J Med* 2015;372:134–141.
- 96 Bundred NJ, Kenemans P, Yip CH, Beckmann MW, Foidart JM, Sismondi P, Schoultz B, Vassilopoulou-Sellin R, Galta RE, Lieshout EV, Mol-Arts M, Planellas J, Kubista E: Tibolone increases bone mineral density but also relapse in breast cancer survivors: LIBERATE trial bone substudy. *Breast Cancer Res* 2012;14:R13.
- 97 Buchholz S, Mogege M, Lintermans A, Bellen G, Prasauskas V, Ortmann O, Grob P, Neven P, Donders G: Vaginal estriol-lactobacilli combination and quality of life in endocrine-treated breast cancer. *Climacteric* 2015;18:252–259.

- 98 Loibl S, Lintermans A, Dieudonne AS, Neven P: Management of menopausal symptoms in breast cancer patients. *Maturitas* 2011;68:148–154.
- 99 Roberts H: Safety of herbal medicinal products in women with breast cancer. *Maturitas* 2010;66:363–369.
- 100 Ma H, Sullivan-Halley J, Smith AW, Neuhouser ML, Alfano CM, Meeske K, George SM, McTiernan A, McKean-Cowdin R, Baumgartner KB, Ballard-Barbash R, Bernstein L: Estrogenic botanical supplements, health-related quality of life, fatigue, and hormone-related symptoms in breast cancer survivors: a HEAL study report. *BMC Complement Altern Med* 2011;11:109.
- 101 Chen MN, Lin CC, Liu CF: Efficacy of phytoestrogens for menopausal symptoms: a meta-analysis and systematic review. *Climacteric* 2015;18:260–269.
- 102 Pruthi S, Qin R, Terstreip SA, Liu H, Loprinzi CL, Shah TR, Tucker KF, Dakhil SR, Bury MJ, Carolla RL, Steen PD, Vuky J, Barton DL: A phase III, randomized, placebo-controlled, double-blind trial of flaxseed for the treatment of hot flashes: North Central Cancer Treatment Group N08C7. *Menopause* 2012;19:48–53.
- 103 Shakeri F, Taavoni S, Goushegir A, Haghani H: Effectiveness of red clover in alleviating menopausal symptoms: a 12-week randomized, controlled trial. *Climacteric* 2015:1–6.
- 104 Leach MJ, Moore V: Black cohosh (*Cimicifuga* spp.) for menopausal symptoms. *Cochrane Database Syst Rev* 2012;(9):CD007244.
- 105 Caraci F, Crupi R, Drago F, Spina E: Metabolic drug interactions between antidepressants and anticancer drugs: focus on selective serotonin reuptake inhibitors and *Hypericum* extract. *Curr Drug Metab* 2011;12:570–577.
- 106 Kim MS, Lim HJ, Yang HJ, Lee MS, Shin BC, Ernst E: Ginseng for managing menopause symptoms: a systematic review of randomized clinical trials. *J Ginseng Res* 2013;37:30–36.
- 107 Moore HC, Unger JM, Phillips KA, Boyle F, Hitre E, Porter D, Francis PA, Goldstein LJ, Gomez HL, Vallejos CS, Partridge AH, Dakhil SR, Garcia AA, Gralow J, Lombard JM, Forbes JF, Martino S, Barlow WE, Fabian CJ, Minasian L, Meyskens FL Jr, Gelber RD, Hortobagyi GN, Albain KS: Goserelin for ovarian protection during breast-cancer adjuvant chemotherapy. *N Engl J Med* 2015;372:923–932.

- 108 Committee on Gynecologic Practice: Committee opinion no. 618: Ovarian reserve testing. *Obstet Gynecol* 2015;125:268–273.
- 109 Casey PM, Faubion SS, MacLaughlin KL, Long ME, Pruthi S: Caring for the breast cancer survivor's health and well-being. *World J Clin Oncol* 2014;5:693–704.
- 110 Losken A, Dugal CS, Styblo TM, Carlson GW: A meta-analysis comparing breast conservation therapy alone to the oncoplastic technique. *Ann Plast Surg* 2014;72:145–149.
- 111 Berbers J, van Baardwijk A, Houben R, Heuts E, Smidt M, Keymeulen K, Bessems M, Tuinder S, Boersma LJ: Reconstruction: before or after postmastectomy radiotherapy? A systematic review of the literature. *Eur J Cancer* 2014;50:2752–2762.
- 112 Kelley BP, Ahmed R, Kidwell KM, Kozlow JH, Chung KC, Momoh AO: A systematic review of morbidity associated with autologous breast reconstruction before and after exposure to radiotherapy: Are current practices ideal? *Ann Surg Oncol* 2014;21:1732–1738.
- 113 Wang XL, Liu LB, Song FM, Wang QY: Meta-analysis of the safety and factors contributing to complications of MS-TRAM, DIEP, and SIEA flaps for breast reconstruction. *Aesthetic Plast Surg* 2014;38:681–691.
- 114 Bao PP, Lu W, Cui Y, Zheng Y, Gu K, Chen Z, Zheng W, Shu XO: Ginseng and *Ganoderma lucidum* use after breast cancer diagnosis and quality of life: a report from the Shanghai Breast Cancer Survival study. *PloS One* 2012;7:e39343.
- 115 Ryan JL, Heckler CE, Ling M, Katz A, Williams JP, Pentland AP, Morrow GR: Curcumin for radiation dermatitis: a randomized, double-blind, placebo-controlled clinical trial of thirty breast cancer patients. *Radiat Res* 2013;180:34–43.
- 116 Pierce JP, Patterson RE, Senger CM, Flatt SW, Caan BJ, Natarajan L, Nechuta SJ, Poole EM, Shu XO, Chen WY: Lifetime cigarette smoking and breast cancer prognosis in the After Breast Cancer Pooling Project. *J Natl Cancer Inst* 2014;106:djt359.
- 117 Xing MY, Xu SZ, Shen P: Effect of low-fat diet on breast cancer survival: a meta-analysis. *Asian Pac J Cancer Prev* 2014;15:1141–1144.

- 118 Kroenke CH, Kwan ML, Sweeney C, Castillo A, Caan BJ: High- and low-fat dairy intake, recurrence, and mortality after breast cancer diagnosis. *J Natl Cancer Inst* 2013;105:616–623.
- 119 Poole EM, Shu X, Caan BJ, Flatt SW, Holmes MD, Lu W, Kwan ML, Nechuta SJ, Pierce JP, Chen WY: Postdiagnosis supplement use and breast cancer prognosis in the After Breast Cancer Pooling Project. *Breast Cancer Res Treat* 2013;139:529–537.
- 120 Harris HR, Orsini N, Wolk A: Vitamin C and survival among women with breast cancer: a meta-analysis. *Eur J Cancer* 2014;50:1223–1231.
- 121 Mohr SB, Gorham ED, Kim J, Hofflich H, Garland CF: Meta-analysis of vitamin D sufficiency for improving survival of patients with breast cancer. *Anticancer Res* 2014;34:1163–1166.
- 122 Greenlee H, Kwan ML, Kushi LH, Song J, Castillo A, Weltzien E, Quesenberry CP Jr, Caan BJ: Antioxidant supplement use after breast cancer diagnosis and mortality in the Life After Cancer Epidemiology (LACE) cohort. *Cancer* 2012;118:2048–2058.
- 123 Fritz H, Seely D, Flower G, Skidmore B, Fernandes R, Vadeboncoeur S, Kennedy D, Cooley K, Wong R, Sagar S, Sabri E, Fergusson D: Soy, red clover, and isoflavones and breast cancer: a systematic review. *PloS One* 2013;8:e81968.
- 124 Fritz H, Seely D, McGowan J, Skidmore B, Fernandes R, Kennedy DA, Cooley K, Wong R, Sagar S, Balneaves LG, Fergusson D: Black cohosh and breast cancer: a systematic review. *Integr Cancer Ther* 2014;13:12–29.
- 125 Towler P, Molassiotis A, Brearley SG: What is the evidence for the use of acupuncture as an intervention for symptom management in cancer supportive and palliative care: an integrative overview of reviews. *Support Care Cancer* 2013;21:2913–2923.
- 126 Cramer H, Lauche R, Paul A, Dobos G: Mindfulness-based stress reduction for breast cancer – a systematic review and meta-analysis. *Curr Oncol (Toronto)* 2012;19:e343–e352.
- 127 Fluorouracil and dose-dense chemotherapy in adjuvant treatment of patients with early-stage breast cancer: an open-label, 2 × 2 factorial, randomised phase 3 trial.



128 Del Mastro L, De Placido S, Bruzzi P, De Laurentiis M, Boni C, Cavazzini G, Durando A, Turletti A, Nisticò C, Valle E, Garrone O, Puglisi F, Montemurro F, Barni S, Ardizzoni A, Gamucci T, Colantuoni G, Giuliano M, Gravina A, Papaldo P, Bighin C, Bisagni G, Forestieri V, Cognetti F; Gruppo Italiano Mammella (GIM) investigators. *Lancet* 2015;385:1863–1872.
